# Supplementary material
Source: publisher site journal article supplement (https://www.dovepress.com/article/571663)
Supplement: Supplementary file 1 [file 571663_Supplementary%20tables.docx]

**Supplementary Table 1** Baseline characteristics of patients stratified by AISI levels

| Variables | Q1 (n = 333) | Q2 (n = 333) | Q3 (n = 333) | Q4 (n = 333) | *P* |
| --- | --- | --- | --- | --- | --- |
| Age (median [IQR]) | 61.00 [52.00, 70.00] | 62.00 [52.00, 70.00] | 63.00 [52.00, 70.00] | 62.00 [51.00, 71.00] | 0.992 |
| Age (%) |  |  |  |  |  |
| ≤60 | 162 (48.6) | 143 (42.9) | 150 (45.0) | 158 (47.4) | 0.458 |
| >60 | 171 (51.4) | 190 (57.1) | 183 (55.0) | 175 (52.6) |  |
| Gender (%) |  |  |  |  |  |
| Male | 147 (44.1) | 171 (51.4) | 184 (55.3) | 194 (58.3) | 0.002 |
| Female | 186 (55.9) | 162 (48.6) | 149 (44.7) | 139 (41.7) |  |
| EBV DNA status (%) |  |  |  |  |  |
| Negative | 132 (69.5) | 135 (70.7) | 141 (70.9) | 125 (67.2) | 0.859 |
| Positive | 58 (30.5) | 56 (29.3) | 58 (29.1) | 61 (32.8) |  |
| B symptom (%) |  |  |  |  |  |
| Absence | 235 (72.1) | 246 (75.5) | 250 (76.5) | 227 (69.2) | 0.139 |
| Presence | 91 (27.9) | 80 (24.5) | 77 (23.5) | 101 (30.8) |  |
| BM involvement (%) |  |  |  |  |  |
| Absence | 257 (87.7) | 274 (93.2) | 274 (90.7) | 278 (92.7) | 0.083 |
| Presence | 36 (12.3) | 20 (6.8) | 28 (9.3) | 22 (7.3) |  |
| Central involvement (%) |  |  |  |  |  |
| Absence | 271 (90.9) | 277 (92.6) | 284 (92.5) | 286 (93.5) | 0.699 |
| Presence | 27 (9.1) | 22 (7.4) | 23 (7.5) | 20 (6.5) |  |
| Liver/Spleen involvement (%) |  |  |  |  |  |
| Absence | 242 (81.2) | 254 (85.5) | 260 (86.1) | 261 (85.9) | 0.293 |
| Presence | 56 (18.8) | 43 (14.5) | 42 (13.9) | 43 (14.1) |  |
| ECOG PS (%) |  |  |  |  |  |
| <2 | 218 (71.2) | 212 (68.4) | 194 (63.2) | 196 (61.8) | 0.044 |
| ≥2 | 88 (28.8) | 98 (31.6) | 113 (36.8) | 121 (38.2) |  |
| Ann Arbor Stage (%) |  |  |  |  |  |
| I/II | 152 (46.2) | 156 (48.3) | 140 (42.4) | 100 (30.6) | <0.001 |
| III/IV | 177 (53.8) | 167 (51.7) | 190 (57.6) | 227 (69.4) |  |
| IPI (%) |  |  |  |  |  |
| LR/LIR | 205 (64.3) | 205 (64.9) | 188 (57.7) | 161 (50.0) | <0.001 |
| HIR/HR | 114 (35.7) | 111 (35.1) | 138 (42.3) | 161 (50.0) |  |
| NCCN IPI (%) |  |  |  |  |  |
| LR/LIR | 171 (58.6) | 167 (57.2) | 168 (55.4) | 135 (45.5) | 0.006 |
| HIR/HR | 121 (41.4) | 125 (42.8) | 135 (44.6) | 162 (54.5) |  |
| LDH (%) |  |  |  |  |  |
| Normal | 182 (59.1) | 196 (63.8) | 147 (47.3) | 128 (41.6) | <0.001 |
| Elevated | 126 (40.9) | 111 (36.2) | 164 (52.7) | 180 (58.4) |  |
| BMI (median [IQR]) | 23.26 [21.57, 25.39] | 23.60 [21.70, 26.11] | 23.45 [21.48, 25.69] | 23.44 [20.70, 25.65] | 0.301 |
| WBC (median [IQR]) | 4.40 [3.30, 5.60] | 5.30 [4.50, 6.30] | 6.20 [5.02, 7.41] | 7.90 [6.40, 10.11] | <0.001 |
| NEU (median [IQR]) | 2.36 [1.74, 3.25] | 3.26 [2.71, 4.03] | 4.24 [3.33, 5.14] | 5.95 [4.72, 7.88] | <0.001 |
| LYC (median [IQR]) | 1.50 [1.00, 2.10] | 1.47 [1.10, 1.90] | 1.30 [0.84, 1.70] | 1.00 [0.70, 1.43] | <0.001 |
| MONO (median [IQR]) | 0.29 [0.21, 0.38] | 0.40 [0.32, 0.49] | 0.50 [0.40, 0.61] | 0.69 [0.54, 0.90] | <0.001 |
| PLT (median [IQR]) | 173.00 [112.00, 219.00] | 214.00 [171.00, 252.00] | 231.00 [183.00, 282.00] | 279.00 [222.00, 355.00] | <0.001 |
| AISI (median [IQR]) | 73.68 [43.56, 102.96] | 190.03 [157.99, 226.07] | 365.71 [306.77, 446.60] | 1008.27 [733.88, 1813.46] | <0.001 |
| RBC (median [IQR]) | 4.04 [3.51, 4.44] | 4.27 [3.80, 4.60] | 4.14 [3.78, 4.56] | 3.99 [3.56, 4.43] | <0.001 |
| HB (median [IQR]) | 120.00 [104.00, 132.00] | 128.00 [112.00, 139.00] | 124.00 [109.00, 138.00] | 116.00 [100.00, 132.00] | <0.001 |
| CRP (median [IQR]) | 3.30 [1.37, 22.45] | 3.30 [1.90, 12.70] | 9.70 [3.27, 30.50] | 23.40 [5.15, 65.20] | <0.001 |
| ALB (median [IQR]) | 40.80 [36.10, 44.60] | 41.00 [37.12, 45.00] | 39.70 [35.80, 42.70] | 36.90 [32.95, 41.15] | <0.001 |
| Cr (median [IQR]) | 58.00 [49.90, 68.00] | 59.00 [49.00, 71.00] | 59.00 [49.00, 71.00] | 59.10 [50.00, 71.00] | 0.554 |
| TG (median [IQR]) | 1.27 [0.93, 1.71] | 1.27 [0.94, 1.78] | 1.20 [0.88, 1.60] | 1.24 [0.92, 1.73] | 0.454 |
| TC (median [IQR]) | 4.25 [3.51, 5.09] | 4.53 [3.79, 5.18] | 4.34 [3.63, 4.85] | 4.27 [3.48, 4.98] | 0.041 |
| FIB (median [IQR]) | 3.01 [2.46, 3.76] | 3.19 [2.56, 4.10] | 3.77 [2.93, 4.40] | 4.22 [3.24, 4.96] | <0.001 |

**Abbreviations:** AISI: aggregate index of systemic inflammation; ALB: albumin; BMI: body mass index; BM involvement: bone marrow involvement; CRP: c**-reactive protein; Cr: creatinine; FIB:** fibrinogen; HB: hemoglobin; IPI: International Prognostic Index; LDH: lactate dehydrogenase; NCCN-IPI: National Comprehensive Cancer Network International Prognostic Index; TC: total cholesterol; TG: t**riglyceride;** LR: low risk; LIR: low intermediate risk; HIR: high intermediate risk; HR: high risk.

**Supplementary Table 2** Sensitivity analysis of AISI quartile grouping and cut-off grouping on the overall survival of DLBCL patients: Results from the Cox regression model

|  | Model 1 (n = 1332) | | | Model 2 (n = 1332) | | | Model 3 (n = 862) | | |
| --- | --- | --- | --- | --- | --- | --- | --- | --- | --- |
|  | HR | 95% CI | *P* | HR | 95% CI | *P* | HR | 95% CI | *P* |
| Q1 | ref | | | ref | | | ref | | |
| Q2 | 0.98 | 0.74-1.30 | 0.879 | 0.93 | 0.70-1.23 | 0.611 | 0.86 | 0.58-1.26 | 0.433 |
| Q3 | 1.17 | 0.89-1.54 | 0.261 | 1.13 | 0.86-1.48 | 0.388 | 1.08 | 0.75-1.56 | 0.676 |
| Q4 | 1.50 | 1.15-1.95 | 0.003 | 1.49 | 1.14-1.94 | 0.004 | 1.41 | 0.99-2.01 | 0.059 |
| AISI ≤ **261.33** | ref | | | ref | | | ref | | |
| AISI > **261.33** | 1.34 | 1.11-1.62 | 0.003 | 1.34 | 1.11-1.63 | 0.003 | 1.33 | 1.03-1.73 | 0.030 |

**Notes:** Model 1: No adjustment. Model 2: Adjusted by age and gender. Model 3: Model 2+ Ann Arbor Stage, LDH, ECOG PS, BMI, ALB, B symptom, BM involvement, central involvement, liver/spleen involvement. **Abbreviations:** ALB: albumin; BMI: body mass index; BM involvement: bone marrow involvement; CI: confidence interval; HR: hazard ratio; LDH: lactate dehydrogenase.
